# Supplementary material for: Distribution and Community Composition of Anammox Bacteria in Shallow Groundwater of the Kathmandu Valley, Nepal
Source: PubMed Central journal article supplement (PMC7966944; doi:10.1264/jsme2.me20143), 2021-03-09
Supplement: 36_20143_s1.pdf [file 36_20143_s1.pdf]

(A)

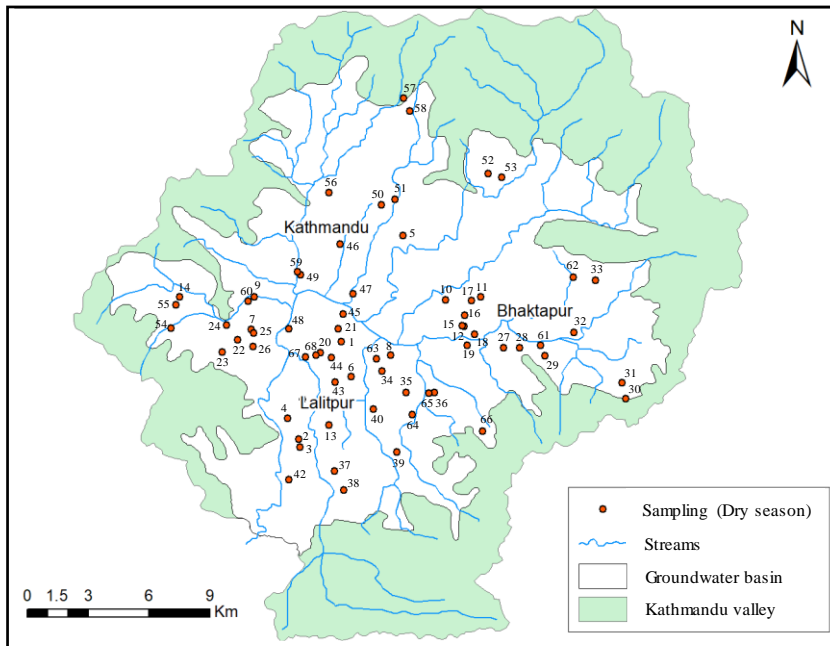

(B)

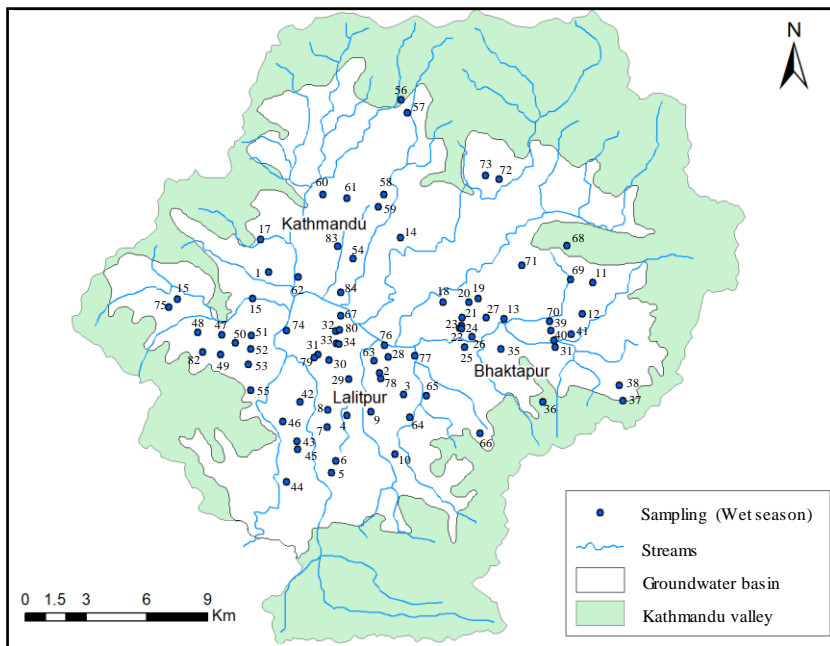

**Fig. S1.** Groundwater sampling locations in shallow dug wells in the Kathmandu Valley: (A) dry season, (B) wet season.

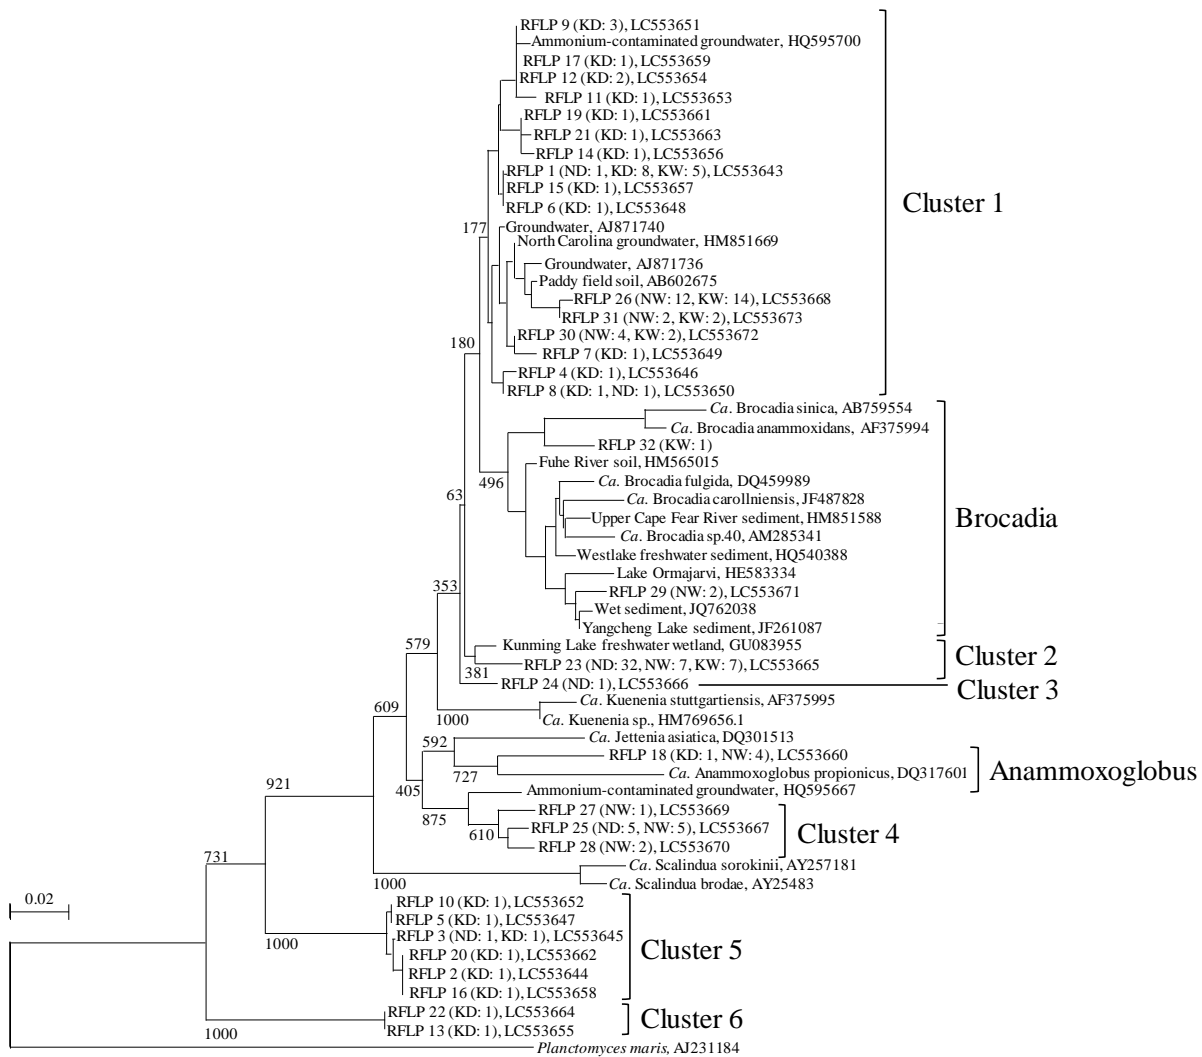

**Fig. S2.** Phylogenetic tree showing relationships of anammox bacteria-related 16S rRNA gene fragments in the clone libraries of groundwater samples from Khumaltar and Nayachok with known anammox bacterial DNA sequences in the GenBank database. The tree was constructed with Clustal X using the neighbor-joining method. Bootstrap node support values higher than 50% are shown ( $n=1,000$  replicates). Representative clones of each RFLP group obtained in this study are indicated. In parentheses following the RFLP number are the sample name (ND, Nayachok in dry season; NW, Nayachok in wet season; KD, Khumaltar in dry season; KW, Khumaltar in wet season) and the number of clones of that RFLP group.

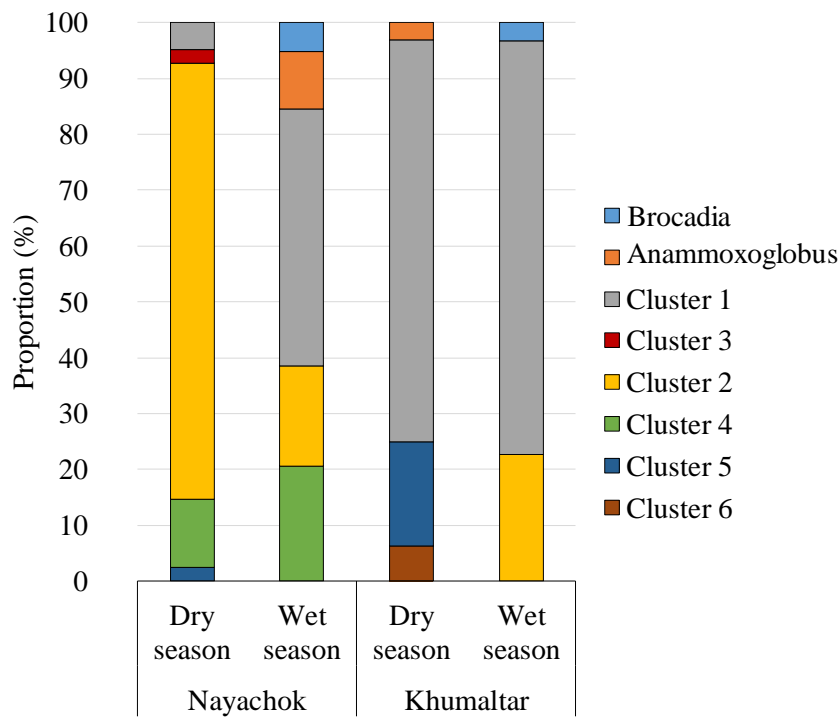

**Fig. S3.** Community compositions of anammox bacteria in shallow groundwater samples from Nayachok and Khumaltar in the dry and wet seasons.

**Table S1. Physicochemical properties of groundwater samples collected from shallow dug wells in the dry season**

| No. | Sample ID | Sample type<br>(subsurface) | Anammox bacterial 16S<br>rRNA gene abundance<br>(copies L <sup>-1</sup> ) <sup>a</sup> | Total bacterial 16S rRNA<br>gene abundance<br>(copies L <sup>-1</sup> ) <sup>a</sup> | NH <sub>4</sub> <sup>+</sup> -N<br>(mg L <sup>-1</sup> ) <sup>b</sup> | NO <sub>3</sub> <sup>-</sup> -N<br>(mg L <sup>-1</sup> ) <sup>b</sup> | Water<br>Temperature<br>(°C) <sup>b*</sup> | pH <sup>b*</sup> |
|-----|-----------|-----------------------------|----------------------------------------------------------------------------------------|--------------------------------------------------------------------------------------|-----------------------------------------------------------------------|-----------------------------------------------------------------------|--------------------------------------------|------------------|
| 1   | KTM 118   | Clay                        | 2.0×10 <sup>5</sup>                                                                    | 3.7×10 <sup>8</sup>                                                                  | 0.9                                                                   | 16.7                                                                  | 18.0                                       | 6.9              |
| 2   | KTM 121   | Clay                        | nd                                                                                     | 3.5×10 <sup>7</sup>                                                                  | 0.3                                                                   | 0.6                                                                   | 18.0                                       | 9.5              |
| 3   | KTM 122   | Clay                        | nd                                                                                     | 7.1×10 <sup>7</sup>                                                                  | nd                                                                    | 1.2                                                                   | 17.6                                       | 7.1              |
| 4   | KTM 124   | Clay                        | 7.7×10 <sup>5</sup>                                                                    | 2.5×10 <sup>8</sup>                                                                  | 2.8                                                                   | 3.9                                                                   | 16.5                                       | 7.0              |
| 5   | KTM 125   | Gravel                      | nd                                                                                     | 6.9×10 <sup>8</sup>                                                                  | nd                                                                    | nd                                                                    | 16.2                                       | 7.1              |
| 6   | KTM 133   | Gravel                      | 4.1×10 <sup>5</sup>                                                                    | 3.4×10 <sup>9</sup>                                                                  | nd                                                                    | 11.4                                                                  | 20.3                                       | 6.2              |
| 7   | KTM 135   | Gravel                      | 5.1×10 <sup>5</sup>                                                                    | 7.8×10 <sup>8</sup>                                                                  | nd                                                                    | nd                                                                    | 17.5                                       | 6.9              |
| 8   | KTM 137   | Clay                        | nd                                                                                     | 2.5×10 <sup>8</sup>                                                                  | nd                                                                    | 5.6                                                                   | 25.0                                       | 6.9              |
| 9   | KTM 140   | Clay                        | 2.3×10 <sup>6</sup>                                                                    | 1.4×10 <sup>8</sup>                                                                  | nd                                                                    | 25.6                                                                  | 19.0                                       | 6.8              |
| 10  | KTM 144   | Clay                        | 2.0×10 <sup>5</sup>                                                                    | 2.2×10 <sup>8</sup>                                                                  | 0.2                                                                   | 17.6                                                                  | 17.5                                       | 6.5              |
| 11  | KTM 147   | Gravel                      | 1.8×10 <sup>5</sup>                                                                    | 2.1×10 <sup>9</sup>                                                                  | 0.2                                                                   | 1.0                                                                   | 19.1                                       | 6.8              |
| 12  | KTM 149   | Gravel                      | nd                                                                                     | 1.9×10 <sup>8</sup>                                                                  | 3.3                                                                   | nd                                                                    | 16.8                                       | 7.5              |
| 13  | KTM 156   | Clay                        | nd                                                                                     | 5.5×10 <sup>9</sup>                                                                  | nd                                                                    | 2.5                                                                   | 17.2                                       | 7.0              |
| 14  | KTM 158   | Clay                        | 2.8×10 <sup>6</sup>                                                                    | 1.3×10 <sup>8</sup>                                                                  | nd                                                                    | nd                                                                    | 18.4                                       | 6.8              |
| 15  | KTM 163   | Clay                        | 6.5×10 <sup>5</sup>                                                                    | 1.5×10 <sup>8</sup>                                                                  | nd                                                                    | 4.4                                                                   | 17.1                                       | 5.9              |
| 16  | KTM 164   | Clay                        | nd                                                                                     | 1.2×10 <sup>8</sup>                                                                  | nd                                                                    | 1.9                                                                   | 16.7                                       | 7.3              |
| 17  | KTM 166   | Clay                        | 1.6×10 <sup>5</sup>                                                                    | 2.4×10 <sup>7</sup>                                                                  | 0.2                                                                   | 26.3                                                                  | 17.4                                       | 6.5              |
| 18  | KTM 167   | Clay                        | 2.3×10 <sup>5</sup>                                                                    | 1.8×10 <sup>8</sup>                                                                  | 1.6                                                                   | 2.5                                                                   | 17.7                                       | 6.6              |

Nakano *et al.* Table S1

| No. | Sample ID | Sample type<br>(subsurface) | Anammox bacterial 16S<br>rRNA gene abundance<br>(copies L <sup>-1</sup> ) <sup>a</sup> | Total bacterial 16S rRNA<br>gene abundance<br>(copies L <sup>-1</sup> ) <sup>a</sup> | NH <sub>4</sub> <sup>+</sup> -N<br>(mg L <sup>-1</sup> ) <sup>b</sup> | NO <sub>3</sub> <sup>-</sup> -N<br>(mg L <sup>-1</sup> ) <sup>b</sup> | Water<br>Temperature<br>(°C) <sup>b*</sup> | pH <sup>b*</sup> |
|-----|-----------|-----------------------------|----------------------------------------------------------------------------------------|--------------------------------------------------------------------------------------|-----------------------------------------------------------------------|-----------------------------------------------------------------------|--------------------------------------------|------------------|
| 19  | KTM 171   | Gravel                      | nd                                                                                     | 1.0×10 <sup>9</sup>                                                                  | nd                                                                    | 3.8                                                                   | 19.3                                       | 6.4              |
| 20  | KTM 172   | Gravel                      | nd                                                                                     | 3.5×10 <sup>8</sup>                                                                  | nd                                                                    | 1.7                                                                   | 17.5                                       | 5.8              |
| 21  | KTM 174   | Gravel                      | 1.7×10 <sup>5</sup>                                                                    | 5.4×10 <sup>7</sup>                                                                  | nd                                                                    | 1.2                                                                   | 18.0                                       | 6.1              |
| 22  | KTM 175   | Gravel                      | nd                                                                                     | 3.0×10 <sup>7</sup>                                                                  | 0.2                                                                   | 3.2                                                                   | 16.4                                       | 6.0              |
| 23  | KTM 182   | Gravel                      | nd                                                                                     | 1.0×10 <sup>7</sup>                                                                  | nd                                                                    | 0.5                                                                   | 17.9                                       | 7.6              |
| 24  | KTM 183   | Gravel                      | nd                                                                                     | 5.0×10 <sup>8</sup>                                                                  | 3.9                                                                   | 0.5                                                                   | 15.9                                       | 6.5              |
| 25  | KTM 184   | Clay                        | nd                                                                                     | 1.6×10 <sup>8</sup>                                                                  | nd                                                                    | 0.2                                                                   | 17.4                                       | 7.0              |
| 26  | KTM 191   | Gravel                      | nd                                                                                     | 6.3×10 <sup>6</sup>                                                                  | 2.2                                                                   | 3.8                                                                   | 18.3                                       | 7.0              |
| 27  | KTM 193   | Gravel                      | 5.4×10 <sup>5</sup>                                                                    | 3.1×10 <sup>9</sup>                                                                  | nd                                                                    | 1.9                                                                   | 17.8                                       | 6.9              |
| 28  | KTM 194   | Gravel                      | 6.0×10 <sup>5</sup>                                                                    | 1.8×10 <sup>9</sup>                                                                  | 1.8                                                                   | 13.4                                                                  | 17.8                                       | 6.4              |
| 29  | KTM 201   | Clay                        | 3.3×10 <sup>6</sup>                                                                    | 7.0×10 <sup>7</sup>                                                                  | nd                                                                    | 27.6                                                                  | 16.8                                       | 6.5              |
| 30  | KTM 203   | Clay                        | nd                                                                                     | 9.0×10 <sup>7</sup>                                                                  | nd                                                                    | 27.6                                                                  | 17.5                                       | 6.5              |
| 31  | KTM 204   | Clay                        | 7.3×10 <sup>5</sup>                                                                    | 6.7×10 <sup>8</sup>                                                                  | nd                                                                    | 6.7                                                                   | 16.8                                       | 6.7              |
| 32  | KTM 208   | Clay                        | nd                                                                                     | 1.6×10 <sup>10</sup>                                                                 | 1.8                                                                   | 3.1                                                                   | 19.8                                       | 6.1              |
| 33  | KTM 209   | Clay                        | nd                                                                                     | 8.1×10 <sup>8</sup>                                                                  | 5.1                                                                   | 13.6                                                                  | 19.8                                       | 6.9              |
| 34  | KTM 212   | Clay                        | nd                                                                                     | 2.3×10 <sup>8</sup>                                                                  | 1.3                                                                   | 0.4                                                                   | 19.0                                       | 7.1              |
| 35  | KTM 213   | Clay                        | nd                                                                                     | 6.3×10 <sup>8</sup>                                                                  | nd                                                                    | 2.1                                                                   | 17.5                                       | 7.4              |
| 36  | KTM 217   | Gravel                      | 7.6×10 <sup>6</sup>                                                                    | 6.3×10 <sup>8</sup>                                                                  | 2.5                                                                   | 6.1                                                                   | 20.1                                       | 6.9              |
| 37  | KTM 218   | Clay                        | nd                                                                                     | 1.6×10 <sup>9</sup>                                                                  | 2.4                                                                   | 0.7                                                                   | 18.0                                       | 6.4              |
| 38  | KTM 219   | Clay                        | 8.9×10 <sup>5</sup>                                                                    | 1.2×10 <sup>9</sup>                                                                  | 4.7                                                                   | 2.3                                                                   | 18.0                                       | 6.5              |

Nakano *et al.* Table S1

| No. | Sample ID | Sample type<br>(subsurface) | Anammox bacterial 16S<br>rRNA gene abundance<br>(copies L <sup>-1</sup> ) <sup>a</sup> | Total bacterial 16S rRNA<br>gene abundance<br>(copies L <sup>-1</sup> ) <sup>a</sup> | NH <sub>4</sub> <sup>+</sup> -N<br>(mg L <sup>-1</sup> ) <sup>b</sup> | NO <sub>3</sub> <sup>-</sup> -N<br>(mg L <sup>-1</sup> ) <sup>b</sup> | Water<br>Temperature<br>(°C) <sup>b*</sup> | pH <sup>b*</sup> |
|-----|-----------|-----------------------------|----------------------------------------------------------------------------------------|--------------------------------------------------------------------------------------|-----------------------------------------------------------------------|-----------------------------------------------------------------------|--------------------------------------------|------------------|
| 39  | KTM 222   | Clay                        | nd                                                                                     | 7.8×10 <sup>9</sup>                                                                  | 2.3                                                                   | 0.4                                                                   | 18.0                                       | 7.1              |
| 40  | KTM 223   | Clay                        | 1.7×10 <sup>6</sup>                                                                    | 1.8×10 <sup>9</sup>                                                                  | 0.6                                                                   | 1.4                                                                   | 18.3                                       | 7.1              |
| 41  | KTM 224   | Clay                        | 1.5×10 <sup>6</sup>                                                                    | 5.2×10 <sup>8</sup>                                                                  | 3.9                                                                   | 1.0                                                                   | 17.3                                       | 7.0              |
| 42  | KTM 228   | Gravel                      | 1.6×10 <sup>6</sup>                                                                    | 1.1×10 <sup>10</sup>                                                                 | 0.6                                                                   | 0.6                                                                   | 18.4                                       | 6.5              |
| 43  | KTM 229   | Clay                        | 1.7×10 <sup>6</sup>                                                                    | 1.3×10 <sup>8</sup>                                                                  | 0.2                                                                   | 0.2                                                                   | 18.8                                       | 6.6              |
| 44  | KTM 230   | Clay                        | nd                                                                                     | 2.1×10 <sup>8</sup>                                                                  | 0.2                                                                   | 1.6                                                                   | 19.4                                       | 6.9              |
| 45  | KTM 231   | Clay                        | nd                                                                                     | 1.9×10 <sup>7</sup>                                                                  | 0.4                                                                   | 0.4                                                                   | 18.3                                       | 6.6              |
| 46  | KTM 232   | Clay                        | nd                                                                                     | 2.4×10 <sup>7</sup>                                                                  | 0.1                                                                   | 4.1                                                                   | 19.2                                       | 6.6              |
| 47  | KTM 233   | Clay                        | 1.8×10 <sup>6</sup>                                                                    | 8.4×10 <sup>9</sup>                                                                  | 0.4                                                                   | 0.3                                                                   | 18.1                                       | 6.3              |
| 48  | KTM 234   | Clay                        | 1.5×10 <sup>6</sup>                                                                    | 7.3×10 <sup>10</sup>                                                                 | 5.6                                                                   | 0.2                                                                   | 18.1                                       | 6.4              |
| 49  | KTM 236   | Gravel                      | 2.8×10 <sup>6</sup>                                                                    | 1.7×10 <sup>10</sup>                                                                 | 5.0                                                                   | 0.6                                                                   | 15.5                                       | 6.9              |
| 50  | KTM 241   | Gravel                      | 1.8×10 <sup>6</sup>                                                                    | 3.5×10 <sup>8</sup>                                                                  | 3.8                                                                   | 1.7                                                                   | 19.4                                       | 6.7              |
| 51  | KTM 245   | Clay                        | nd                                                                                     | 2.7×10 <sup>8</sup>                                                                  | 0.5                                                                   | 0.3                                                                   | 19.6                                       | 6.3              |
| 52  | KTM 247   | Gravel                      | nd                                                                                     | 1.2×10 <sup>9</sup>                                                                  | 2.2                                                                   | nd                                                                    | 18.1                                       | 6.0              |
| 53  | KTM 248   | Clay                        | 3.6×10 <sup>5</sup>                                                                    | 1.8×10 <sup>10</sup>                                                                 | 3.0                                                                   | 0.7                                                                   | 20.8                                       | 6.4              |
| 54  | KTM 249   | Clay                        | 3.7×10 <sup>6</sup>                                                                    | 1.1×10 <sup>8</sup>                                                                  | 5.4                                                                   | 9.6                                                                   | 18.3                                       | 6.7              |
| 55  | KTM 250   | Gravel                      | nd                                                                                     | 1.7×10 <sup>8</sup>                                                                  | 11.4                                                                  | nd                                                                    | 17.5                                       | 6.6              |
| 56  | KTM 251   | Gravel                      | 9.6×10 <sup>5</sup>                                                                    | 1.5×10 <sup>8</sup>                                                                  | nd                                                                    | nd                                                                    | 17.4                                       | 6.6              |
| 57  | KTM 252   | Gravel                      | 3.3×10 <sup>5</sup>                                                                    | 5.4×10 <sup>7</sup>                                                                  | nd                                                                    | 4.1                                                                   | 16.4                                       | 6.5              |
| 58  | KTM 253   | Clay                        | 4.0×10 <sup>5</sup>                                                                    | 4.3×10 <sup>7</sup>                                                                  | 1.4                                                                   | 2.7                                                                   | 19.9                                       | 6.4              |

Nakano *et al.* Table S1

| No. | Sample ID | Sample type<br>(subsurface) | Anammox bacterial 16S<br>rRNA gene abundance<br>(copies L <sup>-1</sup> ) <sup>a</sup> | Total bacterial 16S rRNA<br>gene abundance<br>(copies L <sup>-1</sup> ) <sup>a</sup> | NH <sub>4</sub> <sup>+</sup> -N<br>(mg L <sup>-1</sup> ) <sup>b</sup> | NO <sub>3</sub> <sup>-</sup> -N<br>(mg L <sup>-1</sup> ) <sup>b</sup> | Water<br>Temperature<br>(°C) <sup>b*</sup> | pH <sup>b*</sup> |
|-----|-----------|-----------------------------|----------------------------------------------------------------------------------------|--------------------------------------------------------------------------------------|-----------------------------------------------------------------------|-----------------------------------------------------------------------|--------------------------------------------|------------------|
| 59  | KTM 258   | Clay                        | nd                                                                                     | 3.6×10 <sup>8</sup>                                                                  | nd                                                                    | 24.6                                                                  | 18.5                                       | 6.4              |
| 60  | KTM 260   | Clay                        | nd                                                                                     | 1.8×10 <sup>8</sup>                                                                  | 2.0                                                                   | 0.5                                                                   | 16.5                                       | 6.7              |
| 61  | KTM 262   | Clay                        | 8.4×10 <sup>5</sup>                                                                    | 1.2×10 <sup>7</sup>                                                                  | nd                                                                    | 1.7                                                                   | 17.6                                       | 7.0              |
| 62  | KTM 263   | Clay                        | 3.0×10 <sup>5</sup>                                                                    | 2.1×10 <sup>8</sup>                                                                  | 1.6                                                                   | 0.6                                                                   | 18.9                                       | 6.6              |
| 63  | KTM 264   | Gravel                      | 1.9×10 <sup>6</sup>                                                                    | 3.9×10 <sup>8</sup>                                                                  | nd                                                                    | 3.9                                                                   | 18.4                                       | 6.6              |
| 64  | KTM 265   | Clay                        | nd                                                                                     | 2.9×10 <sup>8</sup>                                                                  | 2.7                                                                   | 4.3                                                                   | 16.7                                       | 6.3              |
| 65  | KTM 267   | Clay                        | nd                                                                                     | 1.0×10 <sup>8</sup>                                                                  | 0.3                                                                   | 1.1                                                                   | 16.9                                       | 6.9              |
| 66  | KTM 268   | Gravel                      | 3.8×10 <sup>5</sup>                                                                    | 4.0×10 <sup>8</sup>                                                                  | nd                                                                    | 0.3                                                                   | 17.6                                       | 7.3              |
| 67  | KTM 269   | Clay                        | 5.4×10 <sup>5</sup>                                                                    | 2.4×10 <sup>9</sup>                                                                  | 0.5                                                                   | 0.7                                                                   | 20.1                                       | 6.8              |
| 68  | KTM 270   | Clay                        | 8.8×10 <sup>6</sup>                                                                    | 9.2×10 <sup>8</sup>                                                                  | 0.3                                                                   | 0.1                                                                   | 20.2                                       | 6.5              |

<sup>a</sup> Data obtained in this study.

<sup>b</sup> Data cited from a previous report (Shakya *et al.*, 2019).

<sup>b\*</sup> Data obtained in a study by Shakya *et al.*, 2019.

Clay = Clay subsurface

Gravel = Gravel subsurface

nd = not detected.

**Table S2. Physicochemical properties of groundwater samples collected from shallow dug wells in the wet season**

| No. | Sample ID | Sample type<br>(subsurface) | Anammox bacterial 16S<br>rRNA gene abundance<br>(copies L <sup>-1</sup> ) <sup>a</sup> | Total bacterial 16S rRNA<br>gene abundance<br>(copies L <sup>-1</sup> ) <sup>a</sup> | NH <sub>4</sub> <sup>+</sup> -N<br>(mg L <sup>-1</sup> ) <sup>b</sup> | NO <sub>3</sub> <sup>-</sup> -N<br>(mg L <sup>-1</sup> ) <sup>b</sup> | Water<br>temperature<br>(°C) <sup>b*</sup> | pH <sup>b*</sup> |
|-----|-----------|-----------------------------|----------------------------------------------------------------------------------------|--------------------------------------------------------------------------------------|-----------------------------------------------------------------------|-----------------------------------------------------------------------|--------------------------------------------|------------------|
| 1   | KTM 288   | Gravel                      | nd                                                                                     | 5.3×10 <sup>8</sup>                                                                  | nd                                                                    | 0.4                                                                   | 23.9                                       | 6.2              |
| 2   | KTM 290   | Gravel                      | 1.1×10 <sup>6</sup>                                                                    | 5.3×10 <sup>8</sup>                                                                  | 0.7                                                                   | 4.7                                                                   | 24.5                                       | 6.7              |
| 3   | KTM 291   | Gravel                      | 1.2×10 <sup>6</sup>                                                                    | 2.8×10 <sup>8</sup>                                                                  | nd                                                                    | 5.1                                                                   | 25.0                                       | 6.7              |
| 4   | KTM 292   | Gravel                      | nd                                                                                     | 2.6×10 <sup>9</sup>                                                                  | 0.1                                                                   | 9.1                                                                   | 24.6                                       | 6.4              |
| 5   | KTM 294   | Gravel                      | nd                                                                                     | 4.3×10 <sup>7</sup>                                                                  | 2.1                                                                   | 4.8                                                                   | 24.0                                       | 6.8              |
| 6   | KTM 295   | Gravel                      | 2.6×10 <sup>5</sup>                                                                    | 5.8×10 <sup>8</sup>                                                                  | 2.5                                                                   | 12.3                                                                  | 23.7                                       | 6.9              |
| 7   | KTM 296   | Clay                        | nd                                                                                     | 3.3×10 <sup>6</sup>                                                                  | 0.8                                                                   | 6.8                                                                   | 21.3                                       | 6.6              |
| 8   | KTM 304   | Gravel                      | 4.0×10 <sup>5</sup>                                                                    | 5.5×10 <sup>9</sup>                                                                  | 0.3                                                                   | 0.2                                                                   | 23.8                                       | 7.3              |
| 9   | KTM 305   | Gravel                      | 2.8×10 <sup>5</sup>                                                                    | 7.6×10 <sup>6</sup>                                                                  | 2.0                                                                   | 0.2                                                                   | 24.0                                       | 6.4              |
| 10  | KTM 306   | Clay                        | nd                                                                                     | 7.9×10 <sup>9</sup>                                                                  | nd                                                                    | 31.7                                                                  | 23.1                                       | 6.6              |
| 11  | KTM 307   | Clay                        | 7.1×10 <sup>5</sup>                                                                    | 3.6×10 <sup>8</sup>                                                                  | 3.4                                                                   | 53.1                                                                  | 25.5                                       | 6.4              |
| 12  | KTM 308   | Gravel                      | 7.1×10 <sup>5</sup>                                                                    | 4.4×10 <sup>8</sup>                                                                  | nd                                                                    | 0.6                                                                   | 25.5                                       | 6.8              |
| 13  | KTM 309   | Gravel                      | 3.2×10 <sup>5</sup>                                                                    | 5.0×10 <sup>7</sup>                                                                  | nd                                                                    | 0.4                                                                   | 24.4                                       | 6.5              |
| 14  | KTM 310   | Gravel                      | nd                                                                                     | 6.7×10 <sup>6</sup>                                                                  | nd                                                                    | 0.5                                                                   | 27.9                                       | 6.3              |
| 15  | KTM 311   | Gravel                      | nd                                                                                     | 4.1×10 <sup>7</sup>                                                                  | 0.1                                                                   | 12.3                                                                  | 25.6                                       | 6.5              |
| 16  | KTM 318   | Clay                        | 5.4×10 <sup>5</sup>                                                                    | 5.3×10 <sup>8</sup>                                                                  | 0.4                                                                   | 41.0                                                                  | 23.1                                       | 6.0              |
| 17  | KTM 320   | Clay                        | 1.4×10 <sup>5</sup>                                                                    | 1.6×10 <sup>8</sup>                                                                  | nd                                                                    | 32.4                                                                  | 25.7                                       | 6.1              |
| 18  | KTM 321   | Clay                        | nd                                                                                     | 2.7×10 <sup>8</sup>                                                                  | 0.3                                                                   | 10.2                                                                  | 26.9                                       | 6.1              |



Nakano *et al.* Table S2

| No. | Sample ID | Sample type<br>(subsurface) | Anammox bacterial 16S<br>rRNA gene abundance<br>(copies L <sup>-1</sup> ) <sup>a</sup> | Total bacterial 16S rRNA<br>gene abundance<br>(copies L <sup>-1</sup> ) <sup>a</sup> | NH <sub>4</sub> <sup>+</sup> -N<br>(mg L <sup>-1</sup> ) <sup>b</sup> | NO <sub>3</sub> <sup>-</sup> -N<br>(mg L <sup>-1</sup> ) <sup>b</sup> | Water<br>temperature<br>(°C) <sup>b*</sup> | pH <sup>b*</sup> |
|-----|-----------|-----------------------------|----------------------------------------------------------------------------------------|--------------------------------------------------------------------------------------|-----------------------------------------------------------------------|-----------------------------------------------------------------------|--------------------------------------------|------------------|
| 19  | KTM 322   | Clay                        | 1.9×10 <sup>5</sup>                                                                    | 5.0×10 <sup>8</sup>                                                                  | 2.1                                                                   | 21.1                                                                  | 23.1                                       | 6.6              |
| 20  | KTM 323   | Clay                        | nd                                                                                     | 1.1×10 <sup>9</sup>                                                                  | 1.4                                                                   | 9.7                                                                   | 23.7                                       | 6.8              |
| 21  | KTM 324   | Clay                        | 2.9×10 <sup>6</sup>                                                                    | 6.6×10 <sup>7</sup>                                                                  | 2.4                                                                   | 0.6                                                                   | 26.3                                       | 7.0              |
| 22  | KTM 326   | Clay                        | 3.1×10 <sup>6</sup>                                                                    | 2.5×10 <sup>8</sup>                                                                  | 0.7                                                                   | 1.7                                                                   | 25.6                                       | 6.7              |
| 23  | KTM 328   | Clay                        | 3.6×10 <sup>5</sup>                                                                    | 1.9×10 <sup>9</sup>                                                                  | 0.6                                                                   | 0.2                                                                   | 22.7                                       | 6.2              |
| 24  | KTM 330   | Clay                        | 2.4×10 <sup>5</sup>                                                                    | 1.5×10 <sup>9</sup>                                                                  | 4.9                                                                   | 15.0                                                                  | 23.3                                       | 6.8              |
| 25  | KTM 332   | Gravel                      | 2.2×10 <sup>5</sup>                                                                    | 2.1×10 <sup>7</sup>                                                                  | nd                                                                    | 2.3                                                                   | 24.9                                       | 6.2              |
| 26  | KTM 333   | Gravel                      | 3.9×10 <sup>5</sup>                                                                    | 5.6×10 <sup>9</sup>                                                                  | 1.2                                                                   | 0.6                                                                   | 26.6                                       | 6.7              |
| 27  | KTM 334   | Gravel                      | 3.3×10 <sup>5</sup>                                                                    | 5.0×10 <sup>8</sup>                                                                  | 1.0                                                                   | 21.6                                                                  | 24.9                                       | 6.0              |
| 28  | KTM 336   | Gravel                      | 1.7×10 <sup>5</sup>                                                                    | 1.6×10 <sup>9</sup>                                                                  | 0.1                                                                   | 3.9                                                                   | 26.3                                       | 6.4              |
| 29  | KTM 337   | Clay                        | 5.9×10 <sup>5</sup>                                                                    | 2.0×10 <sup>7</sup>                                                                  | 2.4                                                                   | 1.5                                                                   | 26.1                                       | 6.6              |
| 30  | KTM 339   | Clay                        | nd                                                                                     | 3.5×10 <sup>9</sup>                                                                  | 0.2                                                                   | 2.8                                                                   | 21.7                                       | 6.2              |
| 31  | KTM 340   | Gravel                      | 5.2×10 <sup>5</sup>                                                                    | 1.3×10 <sup>9</sup>                                                                  | 0.6                                                                   | 4.4                                                                   | 22.4                                       | 5.8              |
| 32  | KTM 342   | Gravel                      | nd                                                                                     | 3.1×10 <sup>8</sup>                                                                  | nd                                                                    | 3.9                                                                   | 25.1                                       | 6.0              |
| 33  | KTM 348   | Gravel                      | 3.3×10 <sup>5</sup>                                                                    | 3.6×10 <sup>6</sup>                                                                  | 0.4                                                                   | 6.1                                                                   | 21.5                                       | 6.7              |
| 34  | KTM 351   | Clay                        | 4.2×10 <sup>5</sup>                                                                    | 5.0×10 <sup>8</sup>                                                                  | nd                                                                    | 16.0                                                                  | 22.2                                       | 6.4              |
| 35  | KTM 352   | Clay                        | 3.4×10 <sup>5</sup>                                                                    | 5.7×10 <sup>8</sup>                                                                  | 0.6                                                                   | 4.5                                                                   | 23.6                                       | 7.2              |
| 36  | KTM 353   | Gravel                      | 7.2×10 <sup>5</sup>                                                                    | 1.0×10 <sup>11</sup>                                                                 | 3.6                                                                   | 8.8                                                                   | 21.1                                       | 7.1              |
| 37  | KTM 355   | Clay                        | 1.0×10 <sup>6</sup>                                                                    | 2.3×10 <sup>9</sup>                                                                  | 4.0                                                                   | 0.3                                                                   | 21.2                                       | 7.1              |
| 38  | KTM 360   | Clay                        | 2.9×10 <sup>5</sup>                                                                    | 2.5×10 <sup>7</sup>                                                                  | nd                                                                    | 0.7                                                                   | 26.3                                       | 6.3              |

Nakano *et al.* Table S2

| No. | Sample ID | Sample type<br>(subsurface) | Anammox bacterial 16S<br>rRNA gene abundance<br>(copies L <sup>-1</sup> ) <sup>a</sup> | Total bacterial 16S rRNA<br>gene abundance<br>(copies L <sup>-1</sup> ) <sup>a</sup> | NH <sub>4</sub> <sup>+</sup> -N<br>(mg L <sup>-1</sup> ) <sup>b</sup> | NO <sub>3</sub> <sup>-</sup> -N<br>(mg L <sup>-1</sup> ) <sup>b</sup> | Water<br>temperature<br>(°C) <sup>b*</sup> | pH <sup>b*</sup> |
|-----|-----------|-----------------------------|----------------------------------------------------------------------------------------|--------------------------------------------------------------------------------------|-----------------------------------------------------------------------|-----------------------------------------------------------------------|--------------------------------------------|------------------|
| 39  | KTM 362   | Clay                        | nd                                                                                     | 4.2×10 <sup>9</sup>                                                                  | 0.1                                                                   | 7.1                                                                   | 27.2                                       | 6.6              |
| 40  | KTM 363   | Clay                        | nd                                                                                     | 2.1×10 <sup>9</sup>                                                                  | 0.4                                                                   | 3.0                                                                   | 29.6                                       | 6.5              |
| 41  | KTM 364   | Clay                        | 2.0×10 <sup>5</sup>                                                                    | 1.5×10 <sup>9</sup>                                                                  | nd                                                                    | 32.7                                                                  | 32.0                                       | 6.4              |
| 42  | KTM 365   | Clay                        | nd                                                                                     | 5.2×10 <sup>9</sup>                                                                  | nd                                                                    | 28.2                                                                  | 29.4                                       | 6.5              |
| 43  | KTM 366   | Clay                        | nd                                                                                     | 2.8×10 <sup>8</sup>                                                                  | nd                                                                    | 23.2                                                                  | 22.6                                       | 6.7              |
| 44  | KTM 367   | Clay                        | nd                                                                                     | 4.6×10 <sup>9</sup>                                                                  | nd                                                                    | 45.5                                                                  | 25.2                                       | 6.5              |
| 45  | KTM 368   | Clay                        | 1.3×10 <sup>5</sup>                                                                    | 1.7×10 <sup>9</sup>                                                                  | 0.5                                                                   | 0.5                                                                   | 30.4                                       | 6.7              |
| 46  | KTM 369   | Clay                        | nd                                                                                     | 9.4×10 <sup>9</sup>                                                                  | 1.3                                                                   | 4.0                                                                   | 31.7                                       | 6.4              |
| 47  | KTM 370   | Clay                        | 4.7×10 <sup>5</sup>                                                                    | 1.2×10 <sup>9</sup>                                                                  | 3.6                                                                   | 0.2                                                                   | 31.4                                       | 6.6              |
| 48  | KTM 377   | Gravel                      | 2.3×10 <sup>5</sup>                                                                    | 6.4×10 <sup>9</sup>                                                                  | 0.2                                                                   | 6.3                                                                   | 23.8                                       | 6.5              |
| 49  | KTM 378   | Gravel                      | 2.0×10 <sup>5</sup>                                                                    | 4.5×10 <sup>9</sup>                                                                  | 1.8                                                                   | 4.1                                                                   | 23.4                                       | 6.6              |
| 50  | KTM 379   | Clay                        | 1.6×10 <sup>5</sup>                                                                    | 7.7×10 <sup>9</sup>                                                                  | nd                                                                    | 1.9                                                                   | 24.5                                       | 7.1              |
| 51  | KTM 381   | Gravel                      | 1.6×10 <sup>5</sup>                                                                    | 7.7×10 <sup>9</sup>                                                                  | 0.7                                                                   | 19.6                                                                  | 25.1                                       | 7.0              |
| 52  | KTM 382   | Clay                        | 4.9×10 <sup>5</sup>                                                                    | 6.3×10 <sup>8</sup>                                                                  | 1.3                                                                   | 24.0                                                                  | 24.5                                       | 6.9              |
| 53  | KTM 383   | Clay                        | 1.9×10 <sup>5</sup>                                                                    | 1.3×10 <sup>8</sup>                                                                  | 0.6                                                                   | 60.3                                                                  | 22.6                                       | 6.4              |
| 54  | KTM 384   | Clay                        | 1.9×10 <sup>5</sup>                                                                    | 1.7×10 <sup>9</sup>                                                                  | 1.8                                                                   | 0.8                                                                   | 21.2                                       | 6.7              |
| 55  | KTM 388   | Gravel                      | nd                                                                                     | 7.4×10 <sup>8</sup>                                                                  | 0.2                                                                   | 8.5                                                                   | 22.5                                       | 7.1              |
| 56  | KTM 389   | Clay                        | nd                                                                                     | 7.1×10 <sup>9</sup>                                                                  | nd                                                                    | 3.5                                                                   | 24.5                                       | 7.3              |
| 57  | KTM 390   | Gravel                      | 2.3×10 <sup>5</sup>                                                                    | 1.9×10 <sup>8</sup>                                                                  | 0.9                                                                   | 17.6                                                                  | 21.2                                       | 6.7              |
| 58  | KTM 394   | Clay                        | nd                                                                                     | 1.1×10 <sup>8</sup>                                                                  | nd                                                                    | 39.8                                                                  | 23.8                                       | 6.5              |

Nakano *et al.* Table S2

| No. | Sample ID | Sample type<br>(subsurface) | Anammox bacterial 16S<br>rRNA gene abundance<br>(copies L <sup>-1</sup> ) <sup>a</sup> | Total bacterial 16S rRNA<br>gene abundance<br>(copies L <sup>-1</sup> ) <sup>a</sup> | NH <sub>4</sub> <sup>+</sup> -N<br>(mg L <sup>-1</sup> ) <sup>b</sup> | NO <sub>3</sub> <sup>-</sup> -N<br>(mg L <sup>-1</sup> ) <sup>b</sup> | Water<br>temperature<br>(°C) <sup>b*</sup> | pH <sup>b*</sup> |
|-----|-----------|-----------------------------|----------------------------------------------------------------------------------------|--------------------------------------------------------------------------------------|-----------------------------------------------------------------------|-----------------------------------------------------------------------|--------------------------------------------|------------------|
| 59  | KTM 395   | Clay                        | nd                                                                                     | 1.3×10 <sup>7</sup>                                                                  | nd                                                                    | 22.5                                                                  | 21.6                                       | 6.7              |
| 60  | KTM 397   | Clay                        | 1.5×10 <sup>5</sup>                                                                    | 4.8×10 <sup>9</sup>                                                                  | nd                                                                    | 4.4                                                                   | 22.5                                       | 7.2              |
| 61  | KTM 398   | Clay                        | nd                                                                                     | 3.0×10 <sup>10</sup>                                                                 | 1.4                                                                   | nd                                                                    | 25.1                                       | 7.2              |
| 62  | KTM 399   | Clay                        | nd                                                                                     | 7.2×10 <sup>9</sup>                                                                  | nd                                                                    | 7.4                                                                   | 24.2                                       | 6.8              |
| 63  | KTM 400   | Clay                        | nd                                                                                     | 1.6× 0 <sup>10</sup>                                                                 | nd                                                                    | 0.8                                                                   | 23.3                                       | 7.2              |
| 64  | KTM 402   | Clay                        | 2.3×10 <sup>5</sup>                                                                    | 2.3×10 <sup>9</sup>                                                                  | nd                                                                    | 39.0                                                                  | 23.8                                       | 7.1              |
| 65  | KTM 403   | Clay                        | 1.4×10 <sup>5</sup>                                                                    | 2.4×10 <sup>9</sup>                                                                  | 2.4                                                                   | 14.9                                                                  | 24.4                                       | 7.1              |
| 66  | KTM 405   | Clay                        | nd                                                                                     | 4.4×10 <sup>9</sup>                                                                  | nd                                                                    | 10.5                                                                  | 23.3                                       | 7.5              |
| 67  | KTM 406   | Gravel                      | nd                                                                                     | 1.5×10 <sup>8</sup>                                                                  | 0.4                                                                   | nd                                                                    | 23.9                                       | 7.1              |
| 68  | KTM 409   | Clay                        | nd                                                                                     | 2.6×10 <sup>9</sup>                                                                  | 0.7                                                                   | 3.9                                                                   | 26.1                                       | 6.2              |
| 69  | KTM 410   | Clay                        | 1.1×10 <sup>5</sup>                                                                    | 3.3×10 <sup>9</sup>                                                                  | nd                                                                    | 0.8                                                                   | 26.5                                       | 6.2              |
| 70  | KTM 412   | Clay                        | nd                                                                                     | 5.7×10 <sup>9</sup>                                                                  | nd                                                                    | 8.9                                                                   | 23.3                                       | 6.6              |
| 71  | KTM 413   | Clay                        | 1.5×10 <sup>5</sup>                                                                    | 9.8×10 <sup>8</sup>                                                                  | nd                                                                    | 0.3                                                                   | 22.1                                       | 5.7              |
| 72  | KTM 415   | Clay                        | nd                                                                                     | 8.3×10 <sup>9</sup>                                                                  | nd                                                                    | 2.2                                                                   | 25.7                                       | 6.9              |
| 73  | KTM 418   | Clay                        | nd                                                                                     | 1.4×10 <sup>9</sup>                                                                  | nd                                                                    | 10.3                                                                  | 22.4                                       | 6.7              |
| 74  | KTM 419   | Clay                        | nd                                                                                     | 7.9×10 <sup>9</sup>                                                                  | 0.2                                                                   | 13.7                                                                  | 22.8                                       | 7.1              |
| 75  | KTM 420   | Gravel                      | nd                                                                                     | 2.1×10 <sup>8</sup>                                                                  | 0                                                                     | 9.8                                                                   | 19.9                                       | 6.3              |
| 76  | KTM 422   | Clay                        | 2.3×10 <sup>5</sup>                                                                    | 4.0×10 <sup>9</sup>                                                                  | 3.5                                                                   | 48.4                                                                  | 21.7                                       | 6.8              |
| 77  | KTM 423   | Clay                        | 4.5×10 <sup>4</sup>                                                                    | 7.9×10 <sup>9</sup>                                                                  | 0.1                                                                   | 1.2                                                                   | 22.8                                       | 6.8              |
| 78  | KTM 424   | Clay                        | nd                                                                                     | 7.9×10 <sup>9</sup>                                                                  | 0.2                                                                   | 3.6                                                                   | 23.3                                       | 7.2              |

Nakano *et al.* Table S2

| No. | Sample ID | Sample type<br>(subsurface) | Anammox bacterial 16S<br>rRNA gene abundance<br>(copies L <sup>-1</sup> ) <sup>a</sup> | Total bacterial 16S rRNA<br>gene abundance<br>(copies L <sup>-1</sup> ) <sup>a</sup> | NH <sub>4</sub> <sup>+</sup> -N<br>(mg L <sup>-1</sup> ) <sup>b</sup> | NO <sub>3</sub> <sup>-</sup> -N<br>(mg L <sup>-1</sup> ) <sup>b</sup> | Water<br>temperature<br>(°C) <sup>b*</sup> | pH <sup>b*</sup> |
|-----|-----------|-----------------------------|----------------------------------------------------------------------------------------|--------------------------------------------------------------------------------------|-----------------------------------------------------------------------|-----------------------------------------------------------------------|--------------------------------------------|------------------|
| 79  | KTM 425   | Clay                        | 1.9×10 <sup>5</sup>                                                                    | 1.1×10 <sup>10</sup>                                                                 | 1.0                                                                   | 4.7                                                                   | 24                                         | 7.3              |
| 80  | KTM 426   | Clay                        | nd                                                                                     | 7.9×10 <sup>9</sup>                                                                  | 1.0                                                                   | 1.7                                                                   | 22.3                                       | 6.9              |
| 81  | KTM 431   | Clay                        | 4.3×10 <sup>4</sup>                                                                    | 5.0×10 <sup>7</sup>                                                                  | 0                                                                     | 24.9                                                                  | 22.7                                       | 6.6              |
| 82  | KTM 432   | Gravel                      | 1.2×10 <sup>5</sup>                                                                    | 1.4×10 <sup>9</sup>                                                                  | 0                                                                     | 13.0                                                                  | 24.5                                       | 6.7              |
| 83  | KTM 448   | Clay                        | 5.7×10 <sup>5</sup>                                                                    | 2.5×10 <sup>9</sup>                                                                  | 3.0                                                                   | 1.8                                                                   | 23.1                                       | 6.5              |
| 84  | KTM 467   | Gravel                      | 4.7×10 <sup>5</sup>                                                                    | 1.1×10 <sup>9</sup>                                                                  | 0.2                                                                   | 8.4                                                                   | 23.4                                       | 7.0              |

<sup>a</sup> Data obtained in this study.

<sup>b</sup> Data cited from the previous report (Shakya *et al.*, 2019).

<sup>b\*</sup> Data obtained in a study by Shakya *et al* (2019).

Clay = Clay subsurface

Gravel = Gravel subsurface

nd = not detected.

**Table S3. Summary of the PCR condition used in this study**

| Primer               | PCR condition |            |            | Cycles |
|----------------------|---------------|------------|------------|--------|
|                      | Denaturation  | Annealing  | Extension  |        |
| AMX-368F<br>Amx-667R | 95°C, 15 s    | 57°C, 30 s | 72°C, 20 s | 35     |
| Eub-515F<br>Eub-806R | 94°C, 15 s    | 55°C, 30 s | 72°C, 20 s | 35     |
| Pla46F<br>Amx820R    | 98°C, 5 s     | 55°C, 5 s  | 72°C, 10 s | 35     |

**Table S4. Physicochemical properties of shallow groundwater samples from Khumaltar and Nayachok**

| Season                        | Sample type                     | Abundance of anammox<br>bacterial 16S rRNA gene<br>(copies L <sup>-1</sup> ) <sup>a</sup> | Abundance of total<br>bacterial 16S rRNA gene<br>(copies L <sup>-1</sup> ) <sup>a</sup> | NH <sub>4</sub> <sup>+</sup> -N concn<br>(mg L <sup>-1</sup> ) <sup>b</sup> | NO <sub>3</sub> <sup>-</sup> -N concn<br>(mg L <sup>-1</sup> ) <sup>b</sup> | Water temp<br>(°C) <sup>b*</sup> | pH <sup>b*</sup> |
|-------------------------------|---------------------------------|-------------------------------------------------------------------------------------------|-----------------------------------------------------------------------------------------|-----------------------------------------------------------------------------|-----------------------------------------------------------------------------|----------------------------------|------------------|
| Dry season                    | Nayachok<br>(Gravel subsurface) | 6.0×10 <sup>5</sup>                                                                       | 1.8×10 <sup>9</sup>                                                                     | 1.8                                                                         | 13.4                                                                        | 17.8                             | 6.4              |
| (February to<br>March 2016)   | Khumaltar<br>(Clay subsurface)  | 2.3×10 <sup>6</sup>                                                                       | 1.4×10 <sup>8</sup>                                                                     | nd                                                                          | 25.6                                                                        | 19.0                             | 6.8              |
| Wet season                    | Nayachok<br>(Gravel subsurface) | 1.1×10 <sup>6</sup>                                                                       | 5.3×10 <sup>8</sup>                                                                     | 0.7                                                                         | 4.7                                                                         | 24.5                             | 6.7              |
| (August to<br>September 2016) | Khumaltar<br>(Clay subsurface)  | 4.9×10 <sup>5</sup>                                                                       | 6.3×10 <sup>8</sup>                                                                     | 1.3                                                                         | 24.0                                                                        | 24.5                             | 6.9              |

<sup>a</sup> Data obtained in this study.

<sup>b</sup> Data cited from a previous report (Shakya *et al.*, 2019).

<sup>b\*</sup> Data obtained in a study by Shakya *et al.*, 2019.

nd =not detected.

**Table S5. Correlation analysis results for anammox bacterial gene abundance and groundwater properties in each area and season**

| Season     | Sample type       | Correlation coefficient*                      |                                          |                                          |               |        |
|------------|-------------------|-----------------------------------------------|------------------------------------------|------------------------------------------|---------------|--------|
|            |                   | Abundance of total bacterial<br>16S rRNA gene | NH <sub>4</sub> <sup>+</sup> -N<br>concn | NO <sub>3</sub> <sup>-</sup> -N<br>concn | Water<br>temp | pH     |
| Dry season | Gravel subsurface | 0.448                                         | -0.220                                   | 0.284                                    | 0.304         | 0.037  |
|            | Clay subsurface   | 0.087                                         | 0.167                                    | 0.109                                    | -0.050        | -0.251 |
| Wet season | Gravel subsurface | 0.265                                         | 0.242                                    | 0.090                                    | -0.040        | 0.161  |
|            | Clay subsurface   | -0.259                                        | 0.430                                    | 0.090                                    | -0.001        | -0.109 |
|            | Total             | 0.045                                         | 0.129                                    | 0.065                                    | 0.010         | -0.107 |

\*Correlation coefficient was analyzed by R statistical software 3.6.0 (R Development Core Team, 2019) using all samples.

**Table S6. RFLP groups detected in this study and their related authentic species based on 16S rRNA gene sequence**

| RFLP group | No. of clones |           |            |           | Most closely related bacterial 16S rRNA gene sequence<br>(Accession No.)    | Identity (%) | Phylum                | Length (bp) | Cluster group |
|------------|---------------|-----------|------------|-----------|-----------------------------------------------------------------------------|--------------|-----------------------|-------------|---------------|
|            | Dry season    |           | Wet season |           |                                                                             |              |                       |             |               |
|            | Nayachok      | Khumaltar | Nayachok   | Khumaltar |                                                                             |              |                       |             |               |
| 1          | 1             | 8         |            | 5         | “ <i>Candidatus</i> Brocadia fulgida”<br>clone Y1_Summer_8<br>(KU217539)    | 98.9         | <i>Planctomycetes</i> | 755         | Cluster 1     |
| 2          |               | 1         |            |           | “ <i>Candidatus</i> Brocadia fulgida”<br>clone Y4_Summer_38<br>(KU217679.1) | 90.2         | <i>Planctomycetes</i> | 736         | Cluster 5     |
| 3          | 1             | 1         |            |           | “ <i>Candidatus</i> Brocadia fulgida”<br>clone Y4_Summer_38<br>(KU217679.1) | 90.2         | <i>Planctomycetes</i> | 737         | Cluster 5     |
| 4          |               | 1         |            |           | “ <i>Candidatus</i> Brocadia fulgida”<br>clone Y1_Summer_16<br>(KU217560.1) | 98.4         | <i>Planctomycetes</i> | 740         | Cluster 1     |
| 5          |               | 1         |            |           | “ <i>Candidatus</i> Brocadia caroliniensis” clone W-DXG-33<br>(JQ889546.1)  | 89.9         | <i>Planctomycetes</i> | 710         | Cluster 5     |
| 6          |               | 1         |            |           | “ <i>Candidatus</i> Brocadia fulgida”<br>clone Y1_Summer_8<br>(KU217539.1)  | 98.7         | <i>Planctomycetes</i> | 767         | Cluster 1     |



Nakano *et al.* Table S6

| RFLP<br>group | No. of clones |           |            |           | Most closely related bacterial<br>16S rRNA gene sequence<br>(Accession No.) | Identity<br>(%) | Phylum                | Length<br>(bp) | Cluster<br>group |
|---------------|---------------|-----------|------------|-----------|-----------------------------------------------------------------------------|-----------------|-----------------------|----------------|------------------|
|               | Dry season    |           | Wet season |           |                                                                             |                 |                       |                |                  |
|               | Nayachok      | Khumaltar | Nayachok   | Khumaltar |                                                                             |                 |                       |                |                  |
| 7             |               | 1         |            |           | “ <i>Candidatus</i> Brocadia fulgida”<br>clone Y4_Summer_16<br>(KU217489.1) | 99.1            | <i>Planctomycetes</i> | 740            | Cluster 1        |
| 8             | 1             |           | 1          |           | “ <i>Candidatus</i> Brocadia fulgida”<br>clone Y1_Summer_16<br>(KU217560.1) | 98.7            | <i>Planctomycetes</i> | 732            | Cluster 1        |
| 9             |               |           | 3          |           | “ <i>Candidatus</i> Brocadia fulgida”<br>clone Y1_Summer_8<br>(KU217539.1)  | 99.3            | <i>Planctomycetes</i> | 692            | Cluster 1        |
| 10            |               |           | 1          |           | “ <i>Candidatus</i> Brocadia fulgida”<br>clone Y4_Summer_38<br>(KU217679.1) | 90.2            | <i>Planctomycetes</i> | 737            | Cluster 5        |
| 11            |               |           | 1          |           | “ <i>Candidatus</i> Brocadia fulgida”<br>clone Y1_Summer_8<br>(KU217539.1)  | 90.1            | <i>Planctomycetes</i> | 721            | Cluster 1        |
| 12            |               |           | 2          |           | “ <i>Candidatus</i> Brocadia fulgida”<br>clone Y1_Summer_8<br>(KU217539.1)  | 99.6            | <i>Planctomycetes</i> | 742            | Cluster 1        |
| 13            |               |           | 1          |           | “ <i>Candidatus</i> Brocadia fulgida”<br>clone S-DXG-25 (JQ889388.1)        | 89.1            | <i>Planctomycetes</i> | 680            | Cluster 6        |

Nakano *et al.* Table S6

| RFLP<br>group | No. of clones |           |            |           | Most closely related bacterial<br>16S rRNA gene sequence<br>(Accession No.)            | Identity<br>(%) | Phylum                | Length<br>(bp) | Cluster<br>group |
|---------------|---------------|-----------|------------|-----------|----------------------------------------------------------------------------------------|-----------------|-----------------------|----------------|------------------|
|               | Dry season    |           | Wet season |           |                                                                                        |                 |                       |                |                  |
|               | Nayachok      | Khumaltar | Nayachok   | Khumaltar |                                                                                        |                 |                       |                |                  |
| 14            | 1             |           |            |           | “ <i>Candidatus Brocadia fulgida</i> ”<br>clone Y1_Summer_16<br>(KU217560.1)           | 98.6            | <i>Planctomycetes</i> | 732            | Cluster 1        |
| 15            | 1             |           |            |           | “ <i>Candidatus Brocadia fulgida</i> ”<br>clone Y1_Summer_8<br>(KU217539.1)            | 98.7            | <i>Planctomycetes</i> | 740            | Cluster 1        |
| 16            | 1             |           |            |           | “ <i>Candidatus Scalindua marina</i> ”<br>clone S-FZ-39<br>(KM925797.1)                | 89.0            | <i>Planctomycetes</i> | 689            | Cluster 5        |
| 17            | 1             |           |            |           | “ <i>Candidatus Brocadia fulgida</i> ”<br>clone Y1_Summer_8<br>(KU217539.1)            | 99.6            | <i>Planctomycetes</i> | 740            | Cluster 1        |
| 18            | 1             | 4         |            |           | “ <i>Candidatus Anammoxoglobus propionicus</i> ” clone<br>Y2_Summer_18<br>(KU217830.1) | 97.8            | <i>Planctomycetes</i> | 741            | Anammoxoglobus   |
| 19            | 1             |           |            |           | “ <i>Candidatus Brocadia fulgida</i> ”<br>clone Y1_Summer_16<br>(KU217560.1)           | 98.9            | <i>Planctomycetes</i> | 754            | Cluster 1        |

Nakano *et al.* Table S6

| RFLP<br>group | No. of clones |           |            |           | Most closely related bacterial<br>16S rRNA gene sequence<br>(Accession No.)              | Identity<br>(%) | Phylum                | Length<br>(bp) | Cluster<br>group |
|---------------|---------------|-----------|------------|-----------|------------------------------------------------------------------------------------------|-----------------|-----------------------|----------------|------------------|
|               | Dry season    |           | Wet season |           |                                                                                          |                 |                       |                |                  |
|               | Nayachok      | Khumaltar | Nayachok   | Khumaltar |                                                                                          |                 |                       |                |                  |
| 20            | 1             |           |            |           | “ <i>Candidatus</i> Brocadia fulgida”<br>clone Y4_Summer_38<br>(KU217679.1)              | 90.1            | <i>Planctomycetes</i> | 751            | Cluster 5        |
| 21            | 1             |           |            |           | “ <i>Candidatus</i> Brocadia fulgida”<br>clone Y1_Summer_16<br>(KU217560.1)              | 98.5            | <i>Planctomycetes</i> | 764            | Cluster 1        |
| 22            | 1             |           |            |           | “ <i>Candidatus</i> Anammoxoglobus<br>propionicus” clone<br>Y2_Summer_21<br>(KU217773.1) | 90.1            | <i>Planctomycetes</i> | 744            | Cluster 6        |
| 23            | 32            |           | 7          | 7         | “ <i>Candidatus</i> Scalindua marina”<br>clone S-FZ-39<br>(KM925797.1)                   | 97.9            | <i>Planctomycetes</i> | 768            | Cluster 2        |
| 24            | 1             |           |            |           | “ <i>Candidatus</i> Scalindua marina”<br>clone S-FZ-39<br>(KM925797.1)                   | 99.3            | <i>Planctomycetes</i> | 747            | Cluster 3        |
| 25            | 5             |           | 5          |           | “ <i>Candidatus</i> Anammoxoglobus<br>propionicus” clone Y2_Winter_13<br>(KU217791.1)    | 97.4            | <i>Planctomycetes</i> | 744            | Cluster 4        |

Nakano *et al.* Table S6

| RFLP<br>group | No. of clones |           |            |           | Most closely related bacterial<br>16S rRNA gene sequence<br>(Accession No.)           | Identity<br>(%) | Phylum                | Length<br>(bp) | Cluster<br>group |
|---------------|---------------|-----------|------------|-----------|---------------------------------------------------------------------------------------|-----------------|-----------------------|----------------|------------------|
|               | Dry season    |           | Wet season |           |                                                                                       |                 |                       |                |                  |
|               | Nayachok      | Khumaltar | Nayachok   | Khumaltar |                                                                                       |                 |                       |                |                  |
| 26            |               |           | 12         | 14        | “ <i>Candidatus</i> Brocadia fulgida”<br>clone Y2_Summer_35<br>(KU217482.1)           | 99.5            | <i>Planctomycetes</i> | 781            | Cluster 1        |
| 27            |               |           | 1          |           | “ <i>Candidatus</i> Anammoxoglobus<br>propionicus” clone Y2_Winter_13<br>(KU217791.1) | 96.3            | <i>Planctomycetes</i> | 767            | Cluster 4        |
| 28            |               |           | 2          |           | “ <i>Candidatus</i> Anammoxoglobus<br>propionicus” clone Y2_Winter_13<br>(KU217791.1) | 98.3            | <i>Planctomycetes</i> | 766            | Cluster 4        |
| 29            |               |           | 2          |           | “ <i>Candidatus</i> Brocadia fulgida”<br>clone Y4_Winter_57<br>(KU217750.1)           | 99.3            | <i>Planctomycetes</i> | 771            | Brocadia         |
| 30            |               |           | 4          | 2         | “ <i>Candidatus</i> Brocadia fulgida”<br>clone Y1_Winter_37<br>(KU217511.1)           | 99.5            | <i>Planctomycetes</i> | 766            | Cluster 1        |
| 31            |               |           | 2          | 2         | “ <i>Candidatus</i> Brocadia fulgida”<br>clone Y2_Summer_35<br>(KU217482.1)           | 99.8            | <i>Planctomycetes</i> | 785            | Cluster 1        |

Nakano *et al.* Table S6

| RFLP<br>group | No. of clones |           |            |           | Most closely related bacterial<br>16S rRNA gene sequence<br>(Accession No.) | Identity<br>(%) | Phylum                | Length<br>(bp) | Cluster<br>group |
|---------------|---------------|-----------|------------|-----------|-----------------------------------------------------------------------------|-----------------|-----------------------|----------------|------------------|
|               | Dry season    |           | Wet season |           |                                                                             |                 |                       |                |                  |
|               | Nayachok      | Khumaltar | Nayachok   | Khumaltar |                                                                             |                 |                       |                |                  |
| 32            |               |           | 1          |           | “ <i>Candidatus</i> Brocadia fulgida”<br>clone AmxW-WSK-17<br>(JX243636.1)  | 98.6            | <i>Planctomycetes</i> | 721            | Brocadia         |
| Total         | 41            | 32        | 39         | 31        |                                                                             |                 |                       |                |                  |
